# Supplementary material
Source: PubMed Central journal article supplement (PMC7384961)
Supplement: NIHMS1599963-supplement-10.pdf [file NIHMS1599963-supplement-10.pdf]

## SUPPLEMENTAL TABLES

**Table S1.** Related to Figure 1. *TBL1XR1* mutations found in Green (DLBCL and FL), and Scott & Morin (DLBCL) cohorts.

| Diagnosis                               | Subtype | Unique ID       | Position       | Ref. Base | Sample Base | AA change | Gene    |
|-----------------------------------------|---------|-----------------|----------------|-----------|-------------|-----------|---------|
| <b>GREEN COHORT (DLBCL and FL)</b>      |         |                 |                |           |             |           |         |
| DLBCL                                   | GCB     | DLBCL_S04-13511 | Chr3:176767918 | T         | A           | p.D190V   | TBL1XR1 |
| DLBCL                                   | ABC     | DLBCL_1205      | Chr3:176765152 | C         | A           | p.G267V   | TBL1XR1 |
| DLBCL                                   | ABC     | DLBCL_SC08-2147 | Chr3:176765088 | C         | C           | p.K288N   | TBL1XR1 |
| DLBCL                                   | ABC     | DLBCL_SC08-2147 | Chr3:176763973 | G         | C           | p.T290R   | TBL1XR1 |
| DLBCL                                   | ABC     | DLBCL_1196      | Chr3:176756181 | C         | C           | p.A323P   | TBL1XR1 |
| DLBCL                                   | ABC     | DLBCL_SC06-1788 | Chr3:176755949 | A         | A           | p.N353K   | TBL1XR1 |
| DLBCL                                   | ABC     | DLBCL_SC05-4166 | Chr3:176752052 | T         | C           | p.Y395C   | TBL1XR1 |
| DLBCL                                   | ABC     | DLBCL_SC04-2367 | Chr3:176750787 | T         | C           | p.D463G   | TBL1XR1 |
| DLBCL                                   | ABC     | DLBCL_1625-SPEC | Chr3:176756223 | C         | A           | none      | TBL1XR1 |
| FL                                      | -       | FL_52852        | Chr3:176752053 | A         | G           | p.Y395H   | TBL1XR1 |
| FL                                      | -       | FL_26039        | Chr3:176744213 | A         | T           | p.V489D   | TBL1XR1 |
| FL                                      | -       | FL_22995        | Chr3:176744184 | C         | T           | p.G499R   | TBL1XR1 |
| <b>SCOTT &amp; MORIN COHORT (DLBCL)</b> |         |                 |                |           |             |           |         |
| DLBCL                                   | GCB     | DLC_0063        | Chr3:176765143 | A         | G           | p.F270S   | TBL1XR1 |
| DLBCL                                   | GCB     | DLC_0157        | Chr3:176756171 | C         | G           | p.S326T   | TBL1XR1 |
| DLBCL                                   | GCB     | DLC_0163        | Chr3:176756104 | A         | T           | p.H348Q   | TBL1XR1 |
| DLBCL                                   | GCB     | DLC_0166        | Chr3:176756146 | A         | C           | p.C334W   | TBL1XR1 |
| DLBCL                                   | GCB     | DLC_0166        | Chr3:176768309 | A         | G           | p.F173L   | TBL1XR1 |
| DLBCL                                   | GCB     | DLC_0261        | Chr3:176750838 | T         | G           | p.Y446S   | TBL1XR1 |
| DLBCL                                   | GCB     | DLC_0261        | Chr3:176750808 | T         | G           | p.Y456S   | TBL1XR1 |
| DLBCL                                   | GCB     | DLC_0280        | Chr3:176755899 | T         | G           | p.D370A   | TBL1XR1 |
| DLBCL                                   | GCB     | DLC_0313        | Chr3:176750881 | C         | A           | p.G432W   | TBL1XR1 |
| DLBCL                                   | GCB     | DLC_0363        | Chr3:176750916 | A         | G           | p.F420S   | TBL1XR1 |
| DLBCL                                   | ABC     | DLC_0052        | Chr3:176755920 | A         | G           | p.L363P   | TBL1XR1 |
| DLBCL                                   | ABC     | DLC_0048        | Chr3:176765300 | C         | T           | p.G247E   | TBL1XR1 |
| DLBCL                                   | ABC     | DLC_0069        | Chr3:176750853 | T         | C           | p.H441R   | TBL1XR1 |
| DLBCL                                   | ABC     | DLC_0069        | Chr3:176744176 | A         | T           | p.S501R   | TBL1XR1 |
| DLBCL                                   | ABC     | DLC_0107        | Chr3:176769363 | C         | T           | p.S119N   | TBL1XR1 |

|       |     |          |                |   |   |         |         |
|-------|-----|----------|----------------|---|---|---------|---------|
| DLBCL | ABC | DLC_0110 | Chr3:176755900 | C | A | p.D370Y | TBL1XR1 |
| DLBCL | ABC | DLC_0131 | Chr3:176750834 | A | C | p.S447R | TBL1XR1 |
| DLBCL | ABC | DLC_0193 | Chr3:176752052 | T | C | p.Y395C | TBL1XR1 |
| DLBCL | ABC | DLC_0219 | Chr3:176752053 | A | C | p.Y395D | TBL1XR1 |
| DLBCL | ABC | DLC_0238 | Chr3:176750836 | T | G | p.S447R | TBL1XR1 |
| DLBCL | ABC | DLC_0278 | Chr3:176755949 | A | T | p.N353K | TBL1XR1 |
| DLBCL | ABC | DLC_0281 | Chr3:176750835 | C | T | p.S447N | TBL1XR1 |
| DLBCL | ABC | DLC_0376 | Chr3:176756209 | A | T | p.D313E | TBL1XR1 |
| DLBCL | ABC | DLC_0376 | Chr3:176769493 | G | A | p.R76*  | TBL1XR1 |
| DLBCL | ABC | DLC_0390 | Chr3:176767805 | C | G | p.V228L | TBL1XR1 |

**Table S6.** Related to STAR Methods. Primers used for RT-qPCR experiments (mouse genes).

| Target mRNA       | Primer sequence                         |
|-------------------|-----------------------------------------|
| Tb11xr1 (Ex11-13) | F: CCA GC AGC AGT TTC CTT TC            |
|                   | R: TGG GTC CCA TTT GAT AGC AT           |
| Il9r              | F: TCC TGG TTC CTG ATC TAC AGC          |
|                   | R: TGT GTT TGA TTT CAG TCA CCT GG       |
| Bcl2              | F: CTG CAC CTG ACG CCC TTC ACC          |
|                   | R: CAC ATG ACC CCA CCG AAC TCA AAG<br>A |
| Ccr6              | F: CCT GGG CAA CAT TAT GGT              |
|                   | R: CAG AAC GGT AGG GTG AGG ACA          |
| Cd38              | F: TCT CTA GGA AAG CCC AGA TCG          |
|                   | R: GTC CAC ACC AGG AGT GAG C            |
| S1pr1             | F: CTT GAG CGA GGC TGC TGT TTC          |
|                   | R: AGC TGC GGA GAG CTT TAA CC           |
| Gpr183            | F: GAC CCA TAA AAG GAC GC               |
|                   | R: CAC AGT CAA TAT CAG AAG GTG GC       |
| Cks1b             | F: TAT TCG GAC AAA TAC GAC GAC G        |
|                   | R: GGT TCC TCC ATT CAG ATT CAG AC       |
| Trp53             | F: CTC TCC CCC GCA AAA GAA AAA          |
|                   | R: CGG AAC ATC TCG AAG CGT TTA          |

|        |                                  |
|--------|----------------------------------|
| Cdkn1b | F: TCA AAC GTG AGA GTG TCT AAC G |
|        | R: CCG GGC CGA AGA GAT TTC TG    |
| Cdkn1a | F: CCT GGT GAT GTC CGA CCT G     |
|        | R: CCA TGA GCG CAT CGC AAT C     |
| Cdkn2a | F: GGA GAG ATA GTG CCA CCT CC    |
|        | R: TGT TCA CGA AAG CCA GAG CG    |
| Aicda  | F: TCT CAG AAA CTC AGC CAC GT    |
|        | R: GGA GAG ATA GTG CCA CCT CC    |
| Gapdh  | F: CCA GAA CAT CCC TGC AT        |
|        | R: GTT CAG CTC TGG GAT GAC CTT   |
| Actin  | F: ATG GAG GGG AAT ACA GCCC      |
|        | R: TTC TTT GCA GCT CCT TCG TT    |
