# Supplementary material
Source: PubMed Central journal article supplement (PMC7384961)

# FIGURE S2

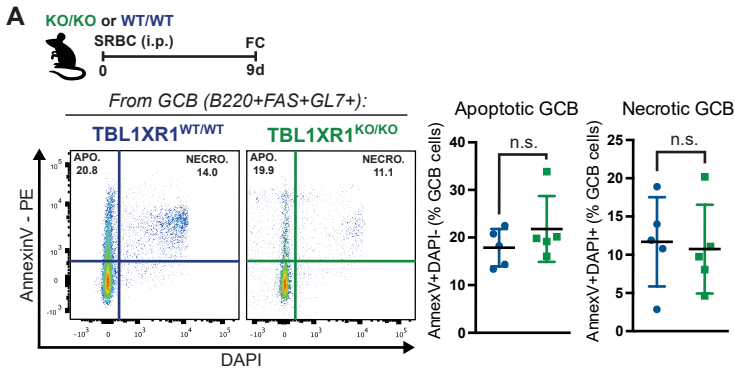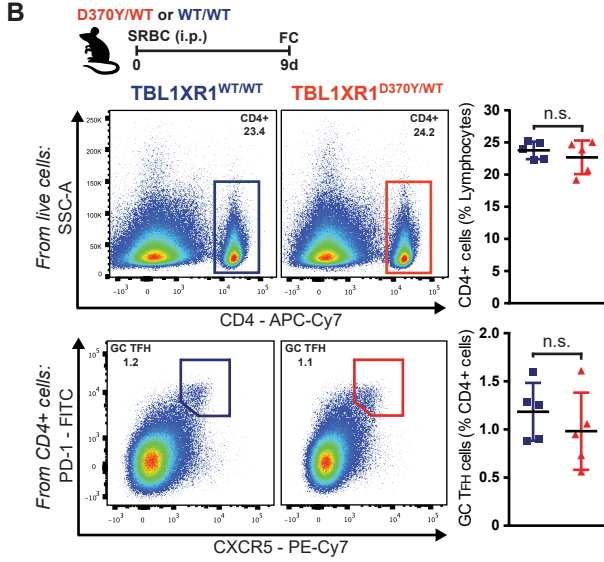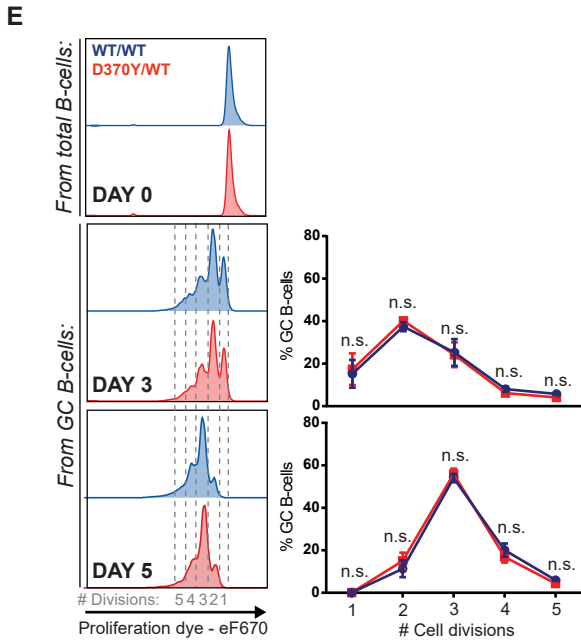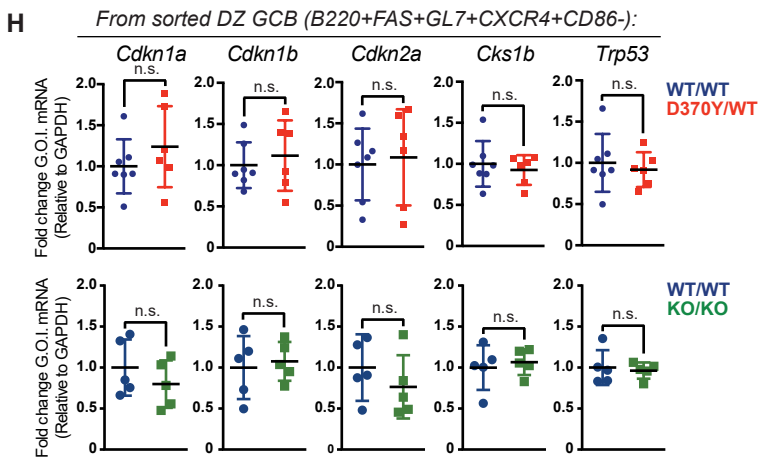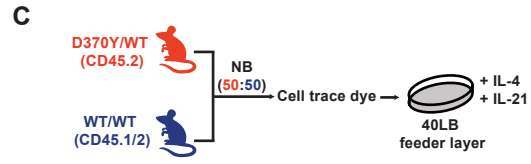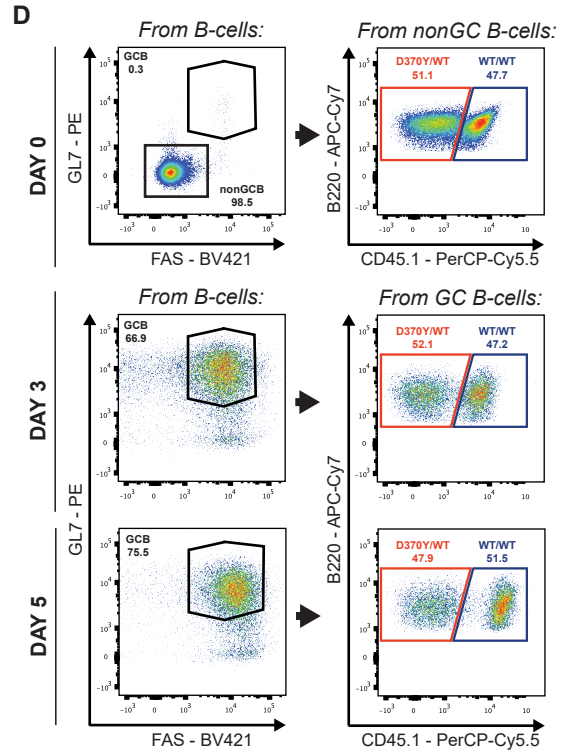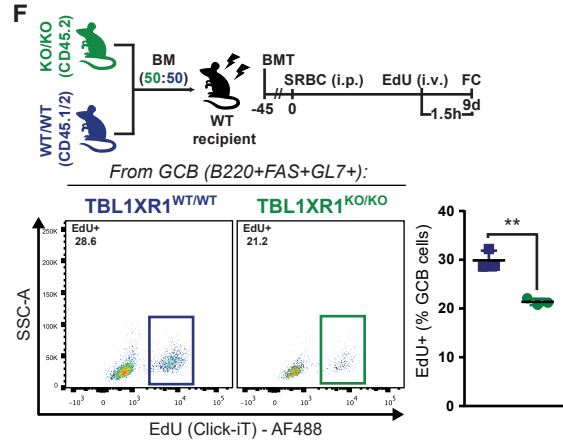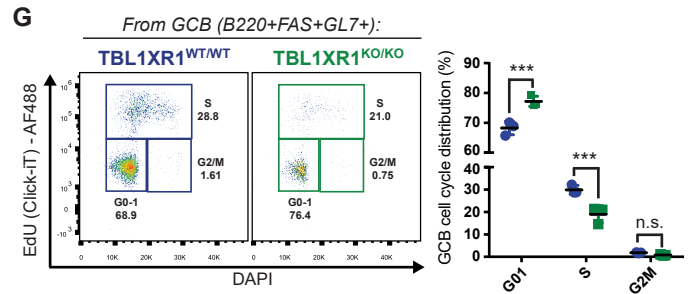

From sorted DZ GCB (B220+FAS+GL7+CXCR4+CD86-):

Supplement: NIHMS1599963-supplement-2.pdf [file NIHMS1599963-supplement-2.pdf]

# FIGURE S3

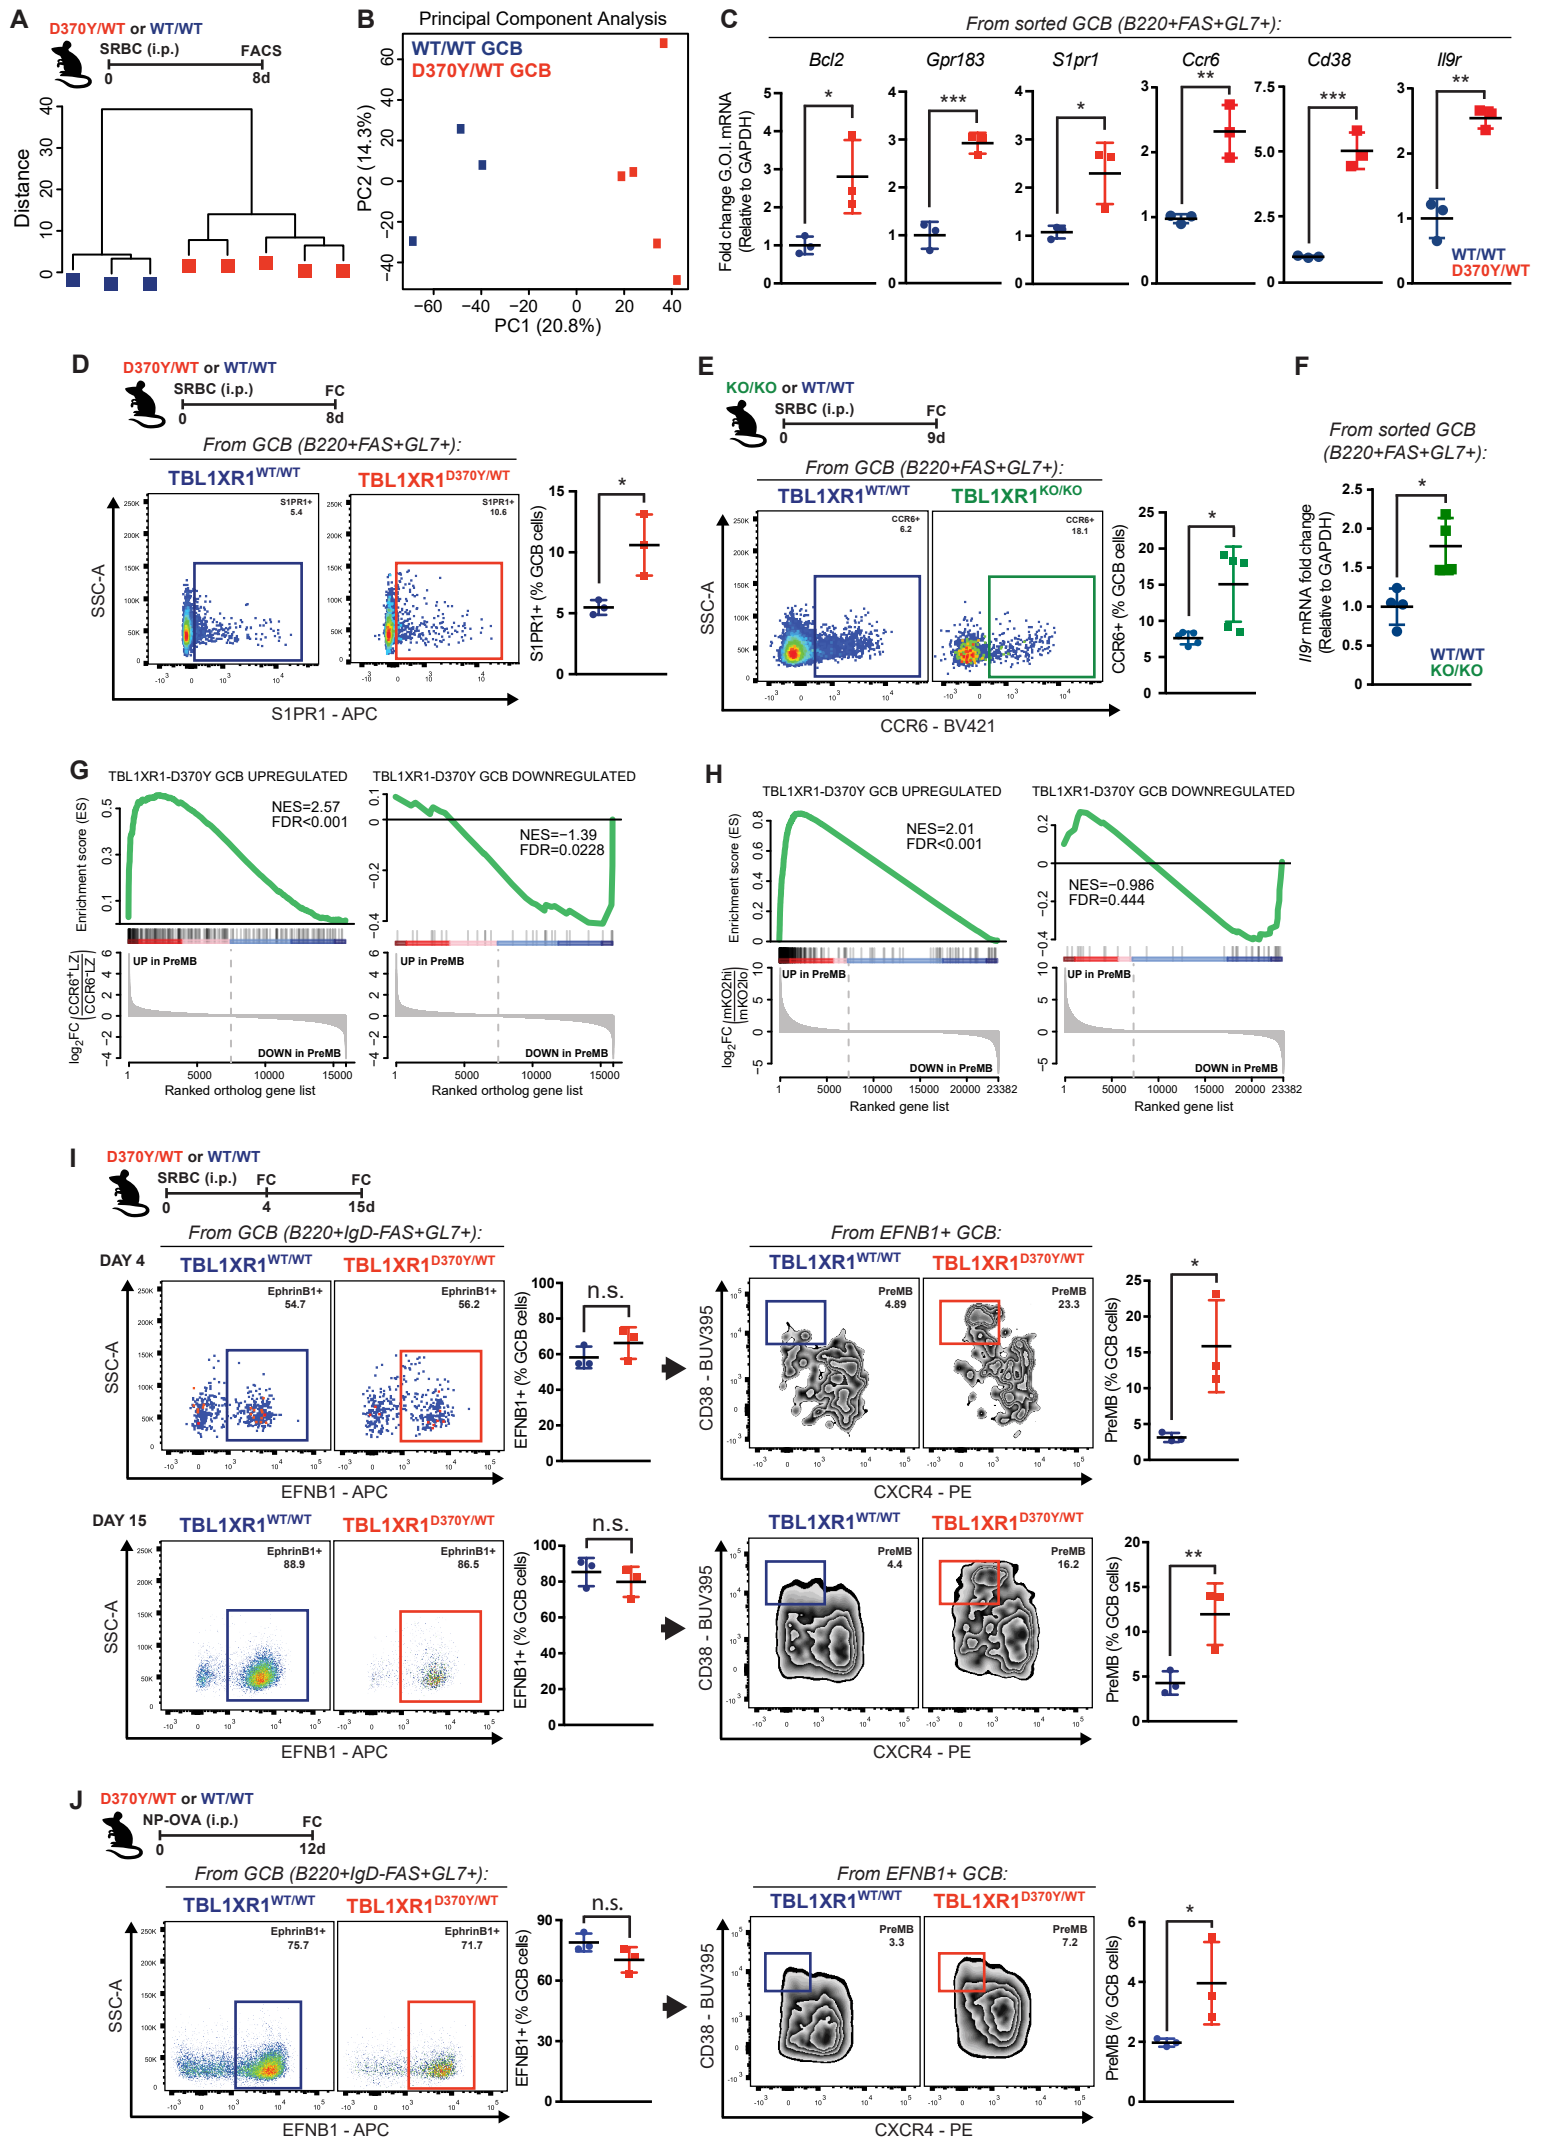

Supplement: NIHMS1599963-supplement-3.pdf [file NIHMS1599963-supplement-3.pdf]

**FIGURE S4**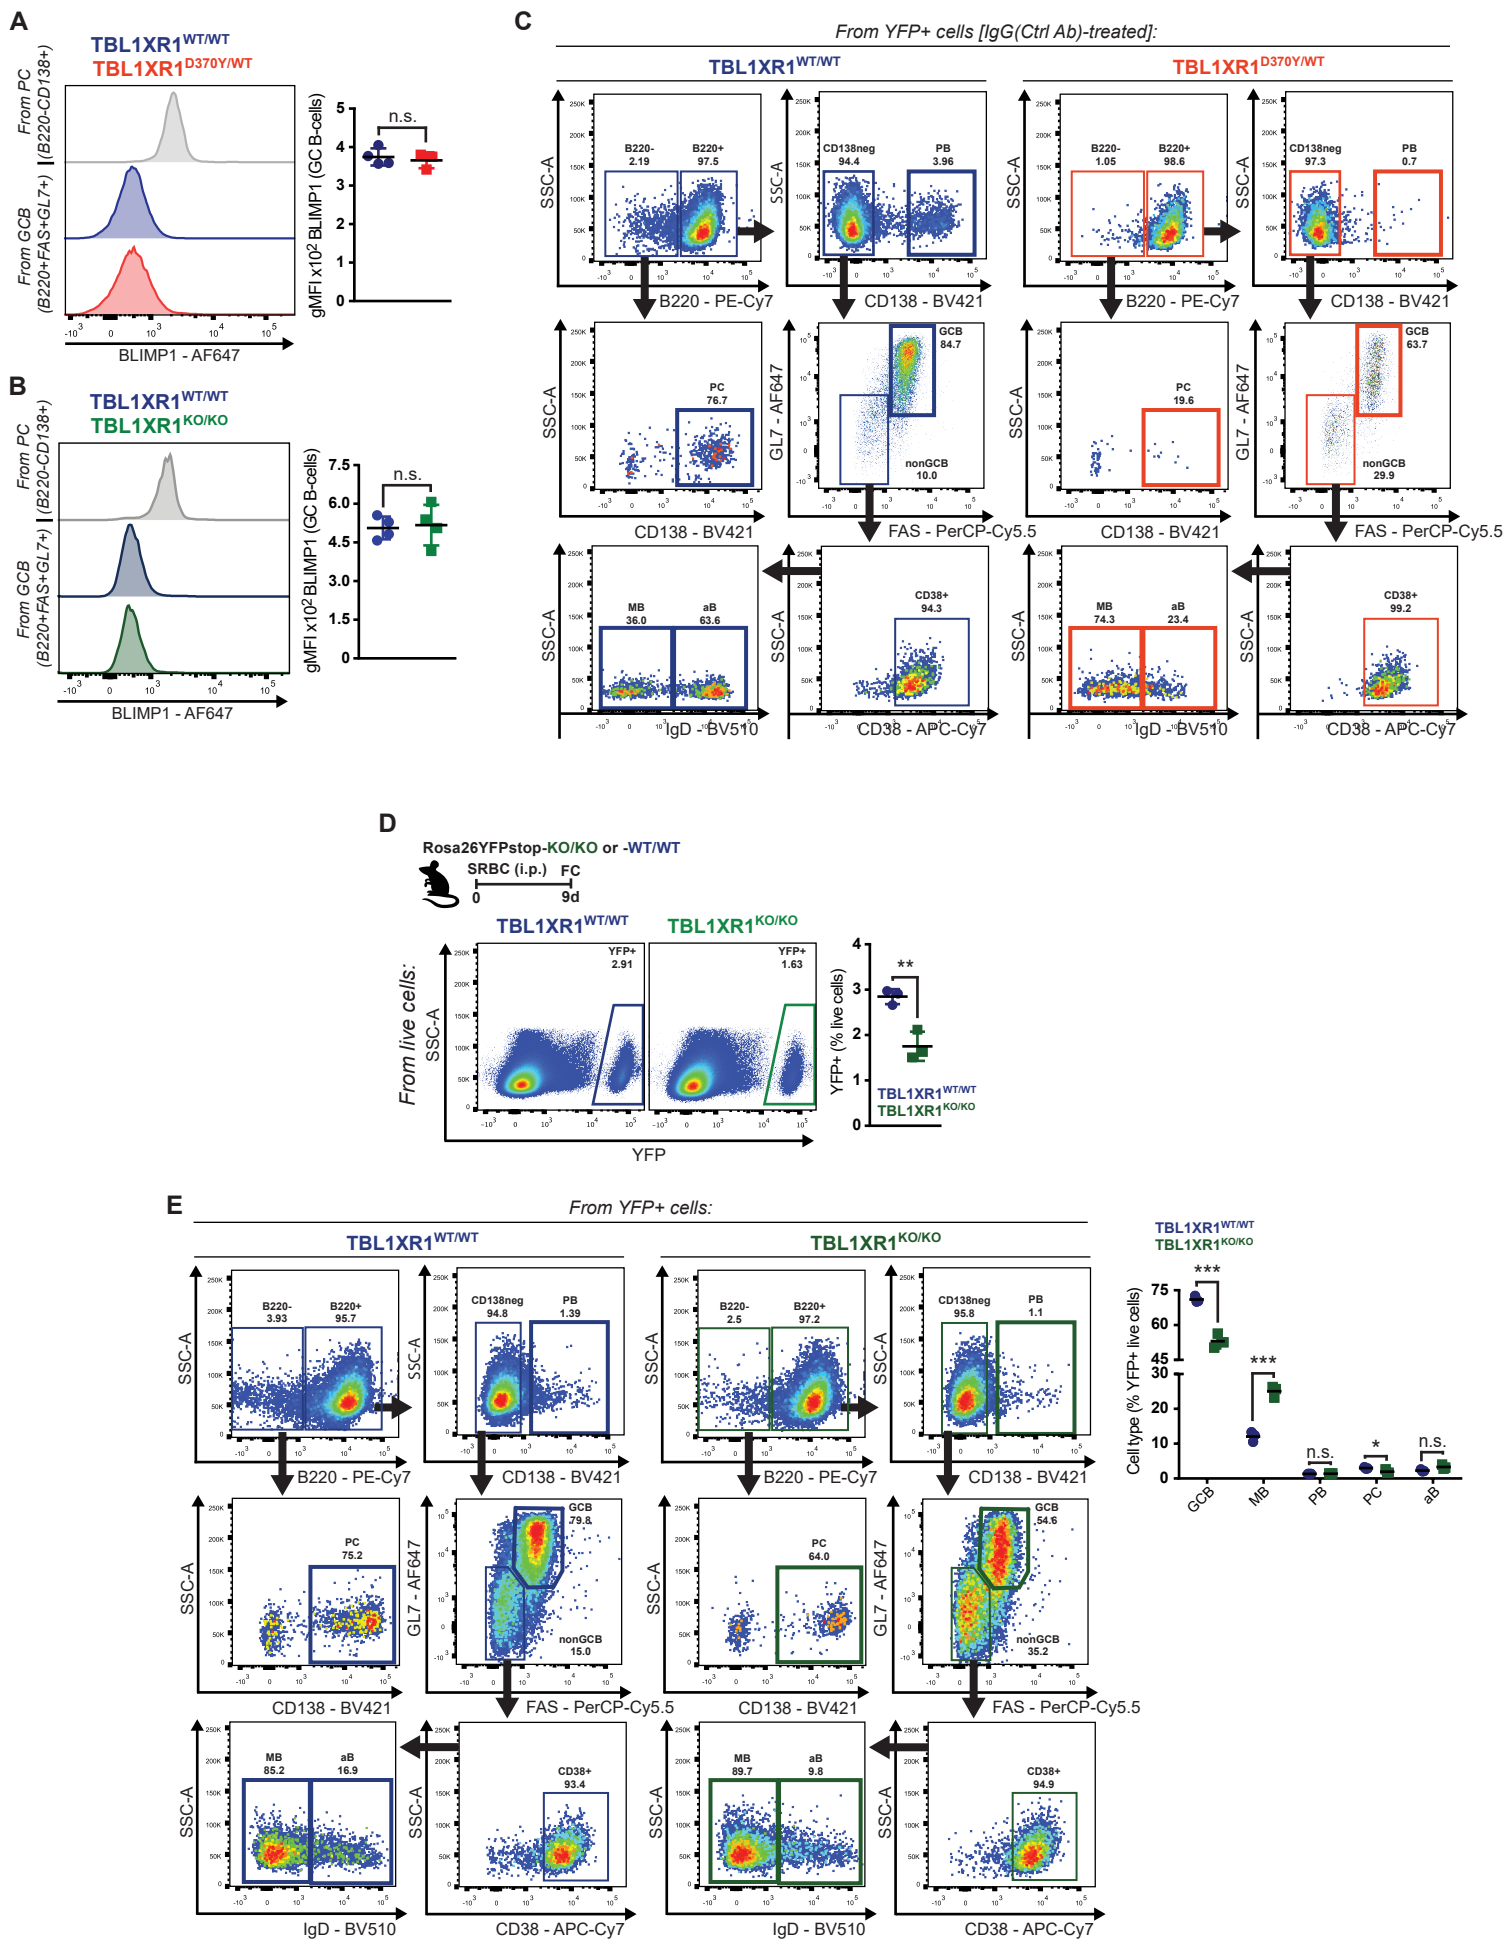

Supplement: NIHMS1599963-supplement-4.pdf [file NIHMS1599963-supplement-4.pdf]

**FIGURE S5**

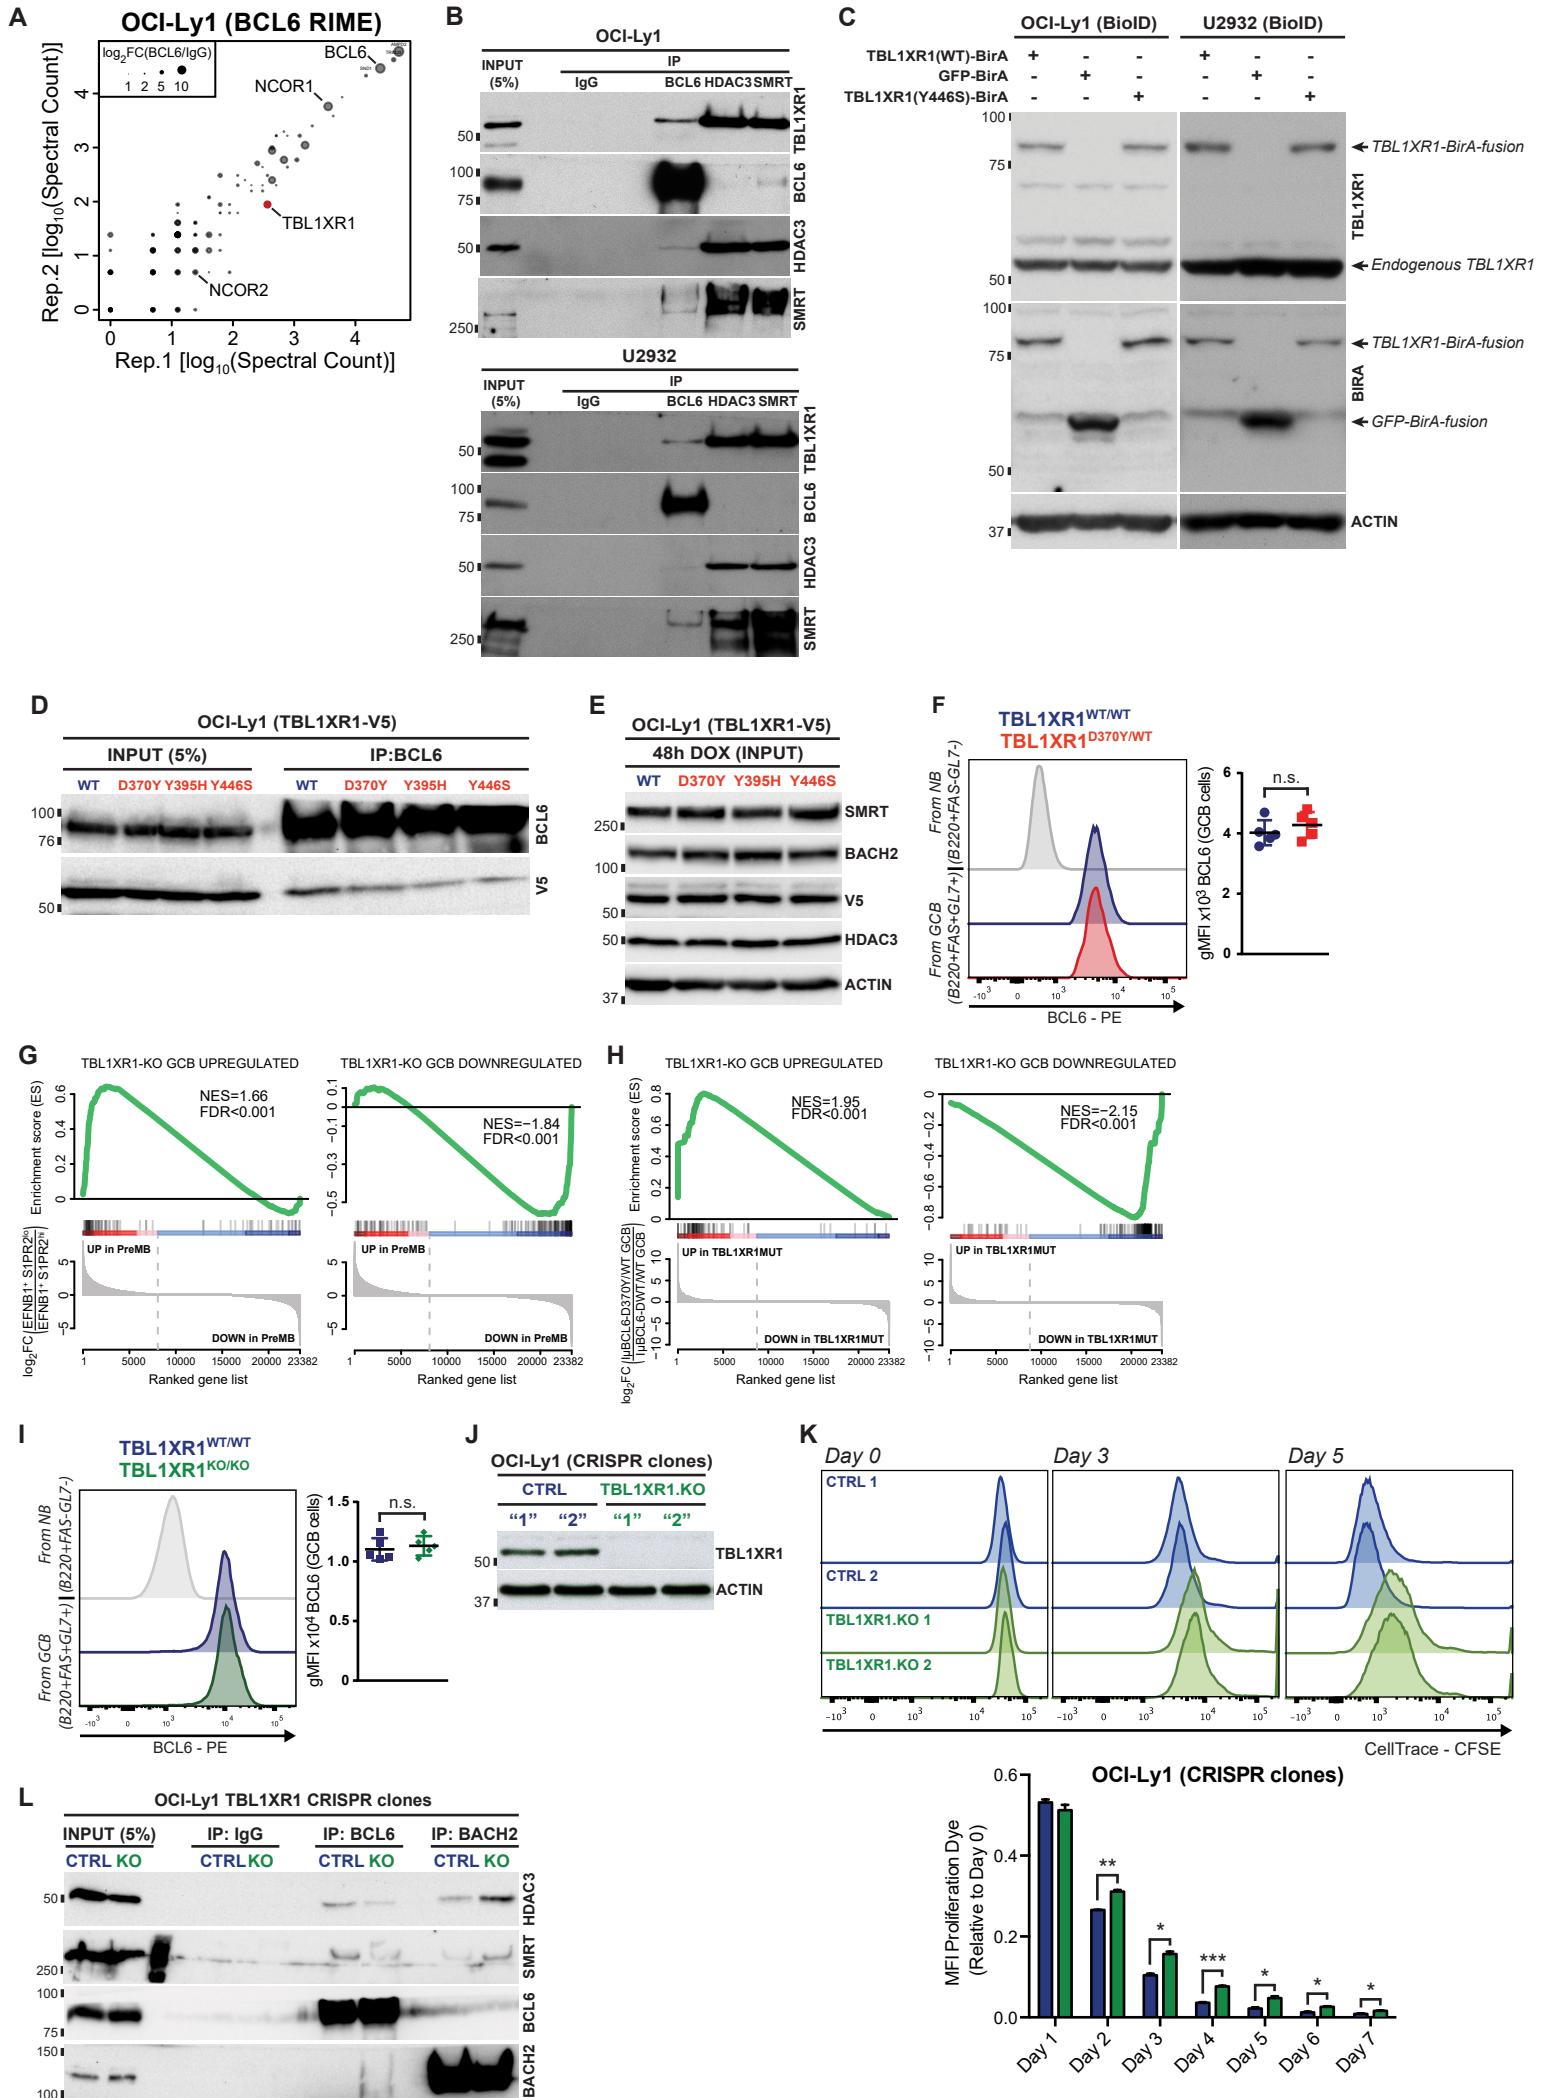

Supplement: NIHMS1599963-supplement-5.pdf [file NIHMS1599963-supplement-5.pdf]

# FIGURE S6

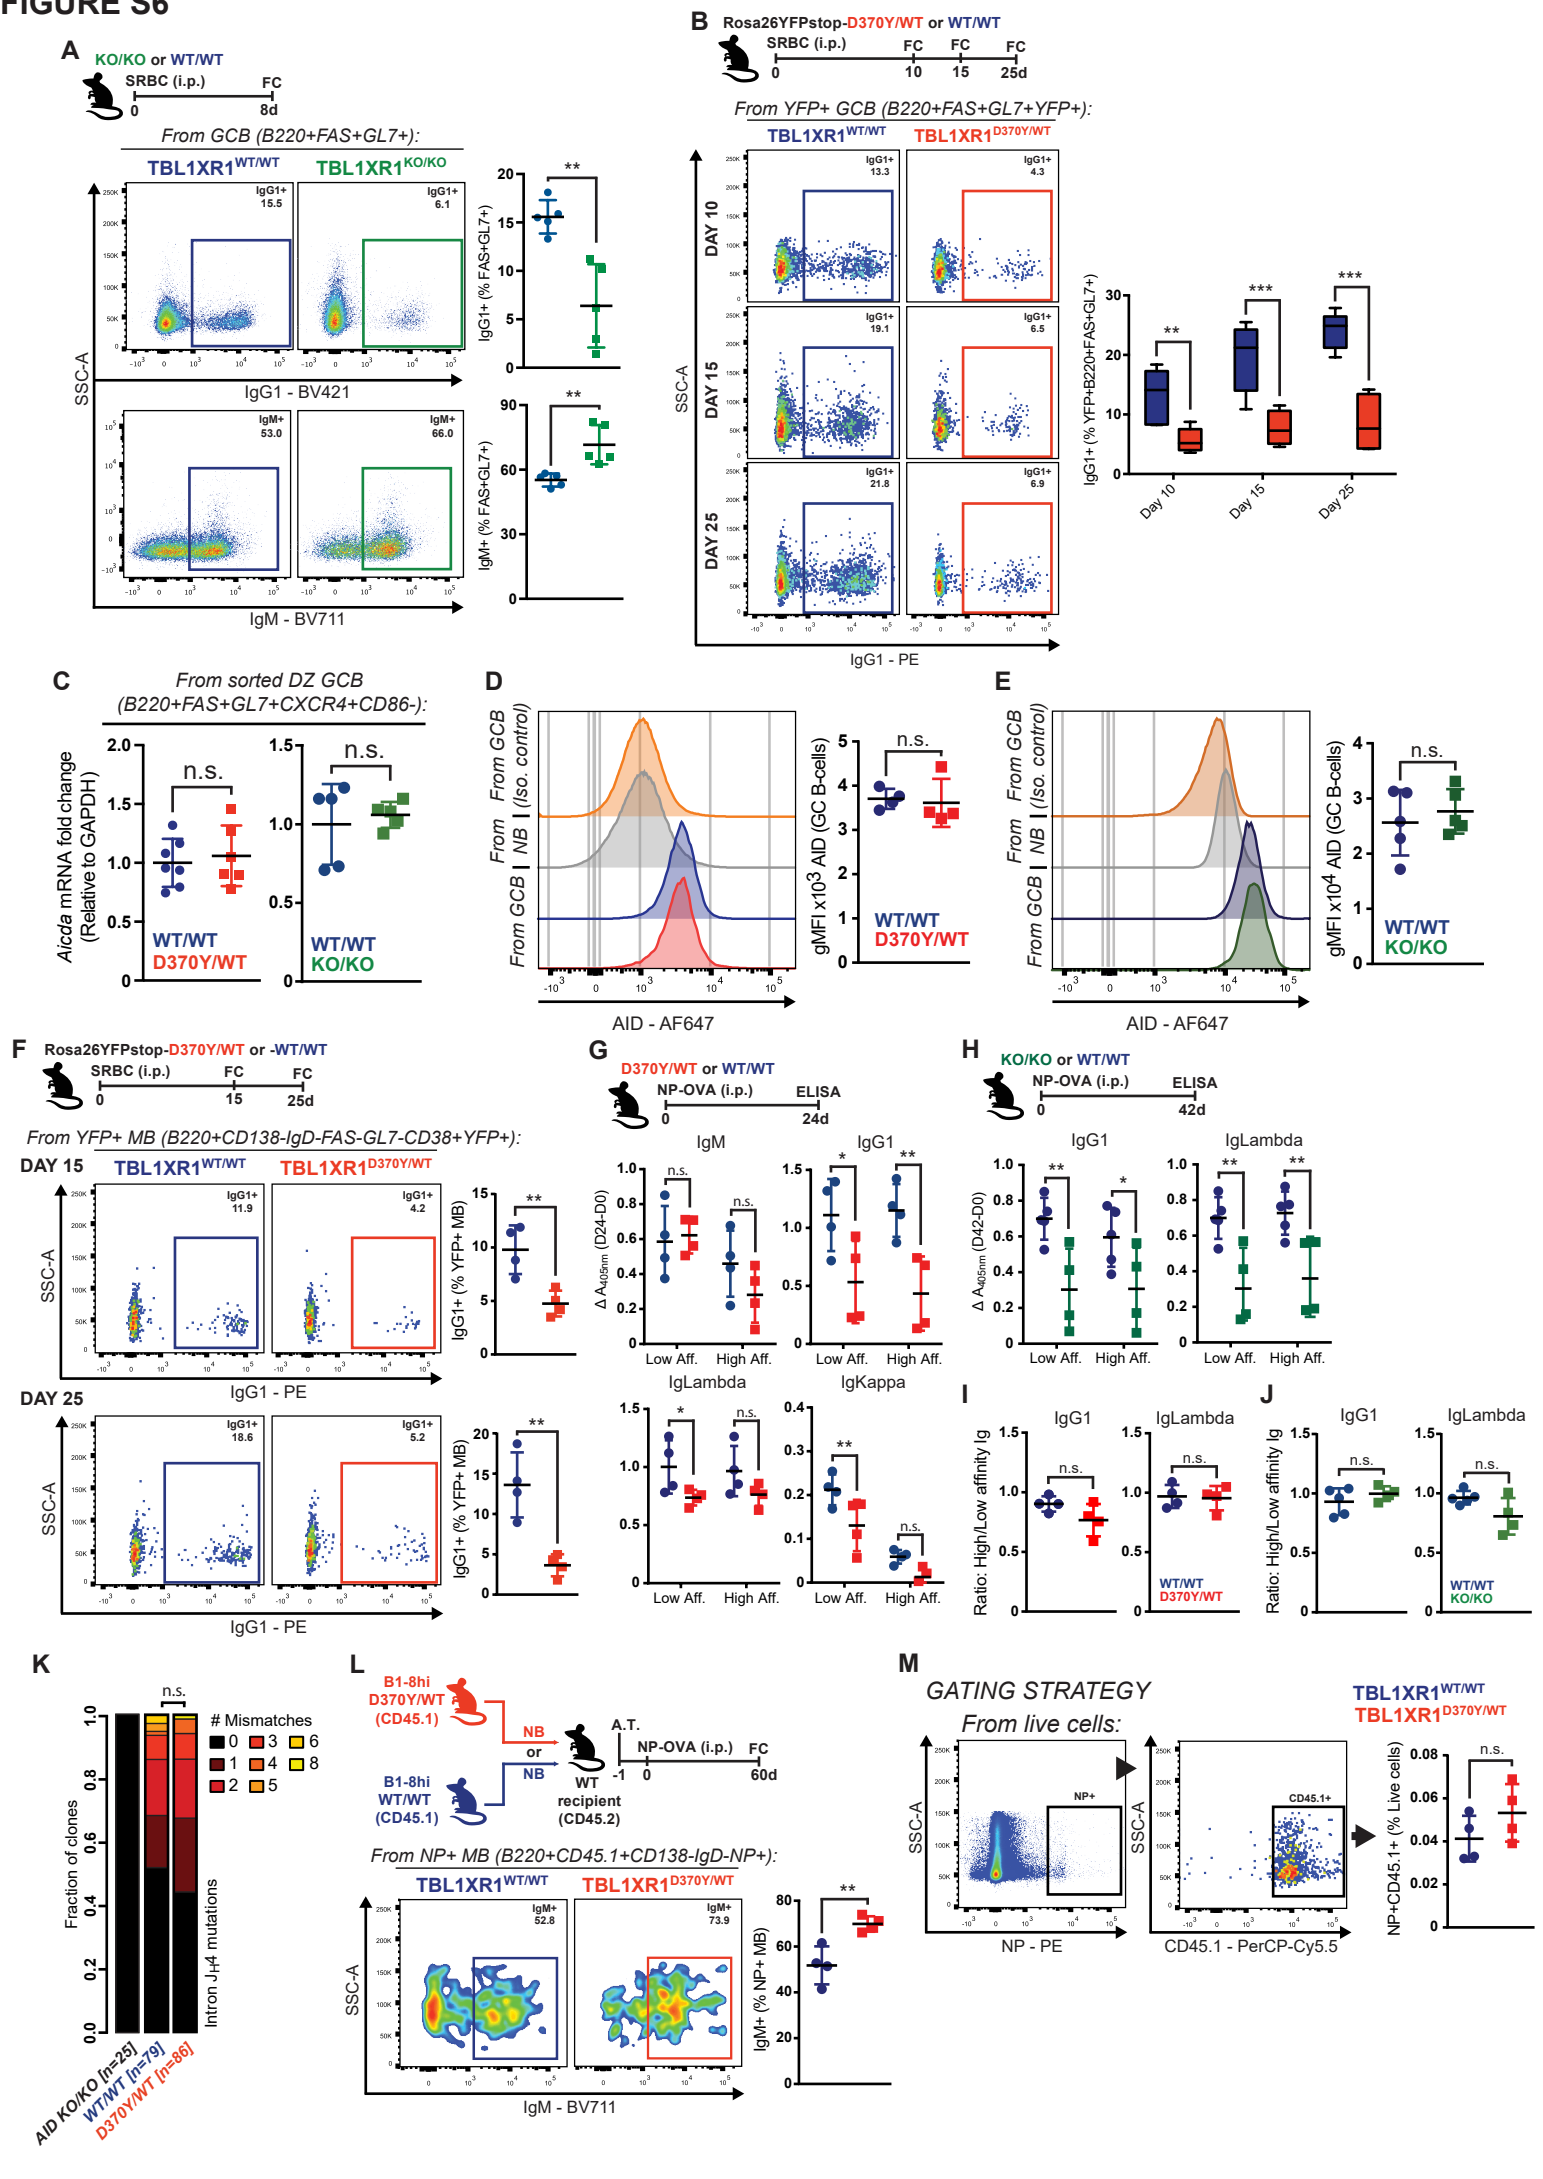

Supplement: NIHMS1599963-supplement-6.pdf [file NIHMS1599963-supplement-6.pdf]

**FIGURE S7**

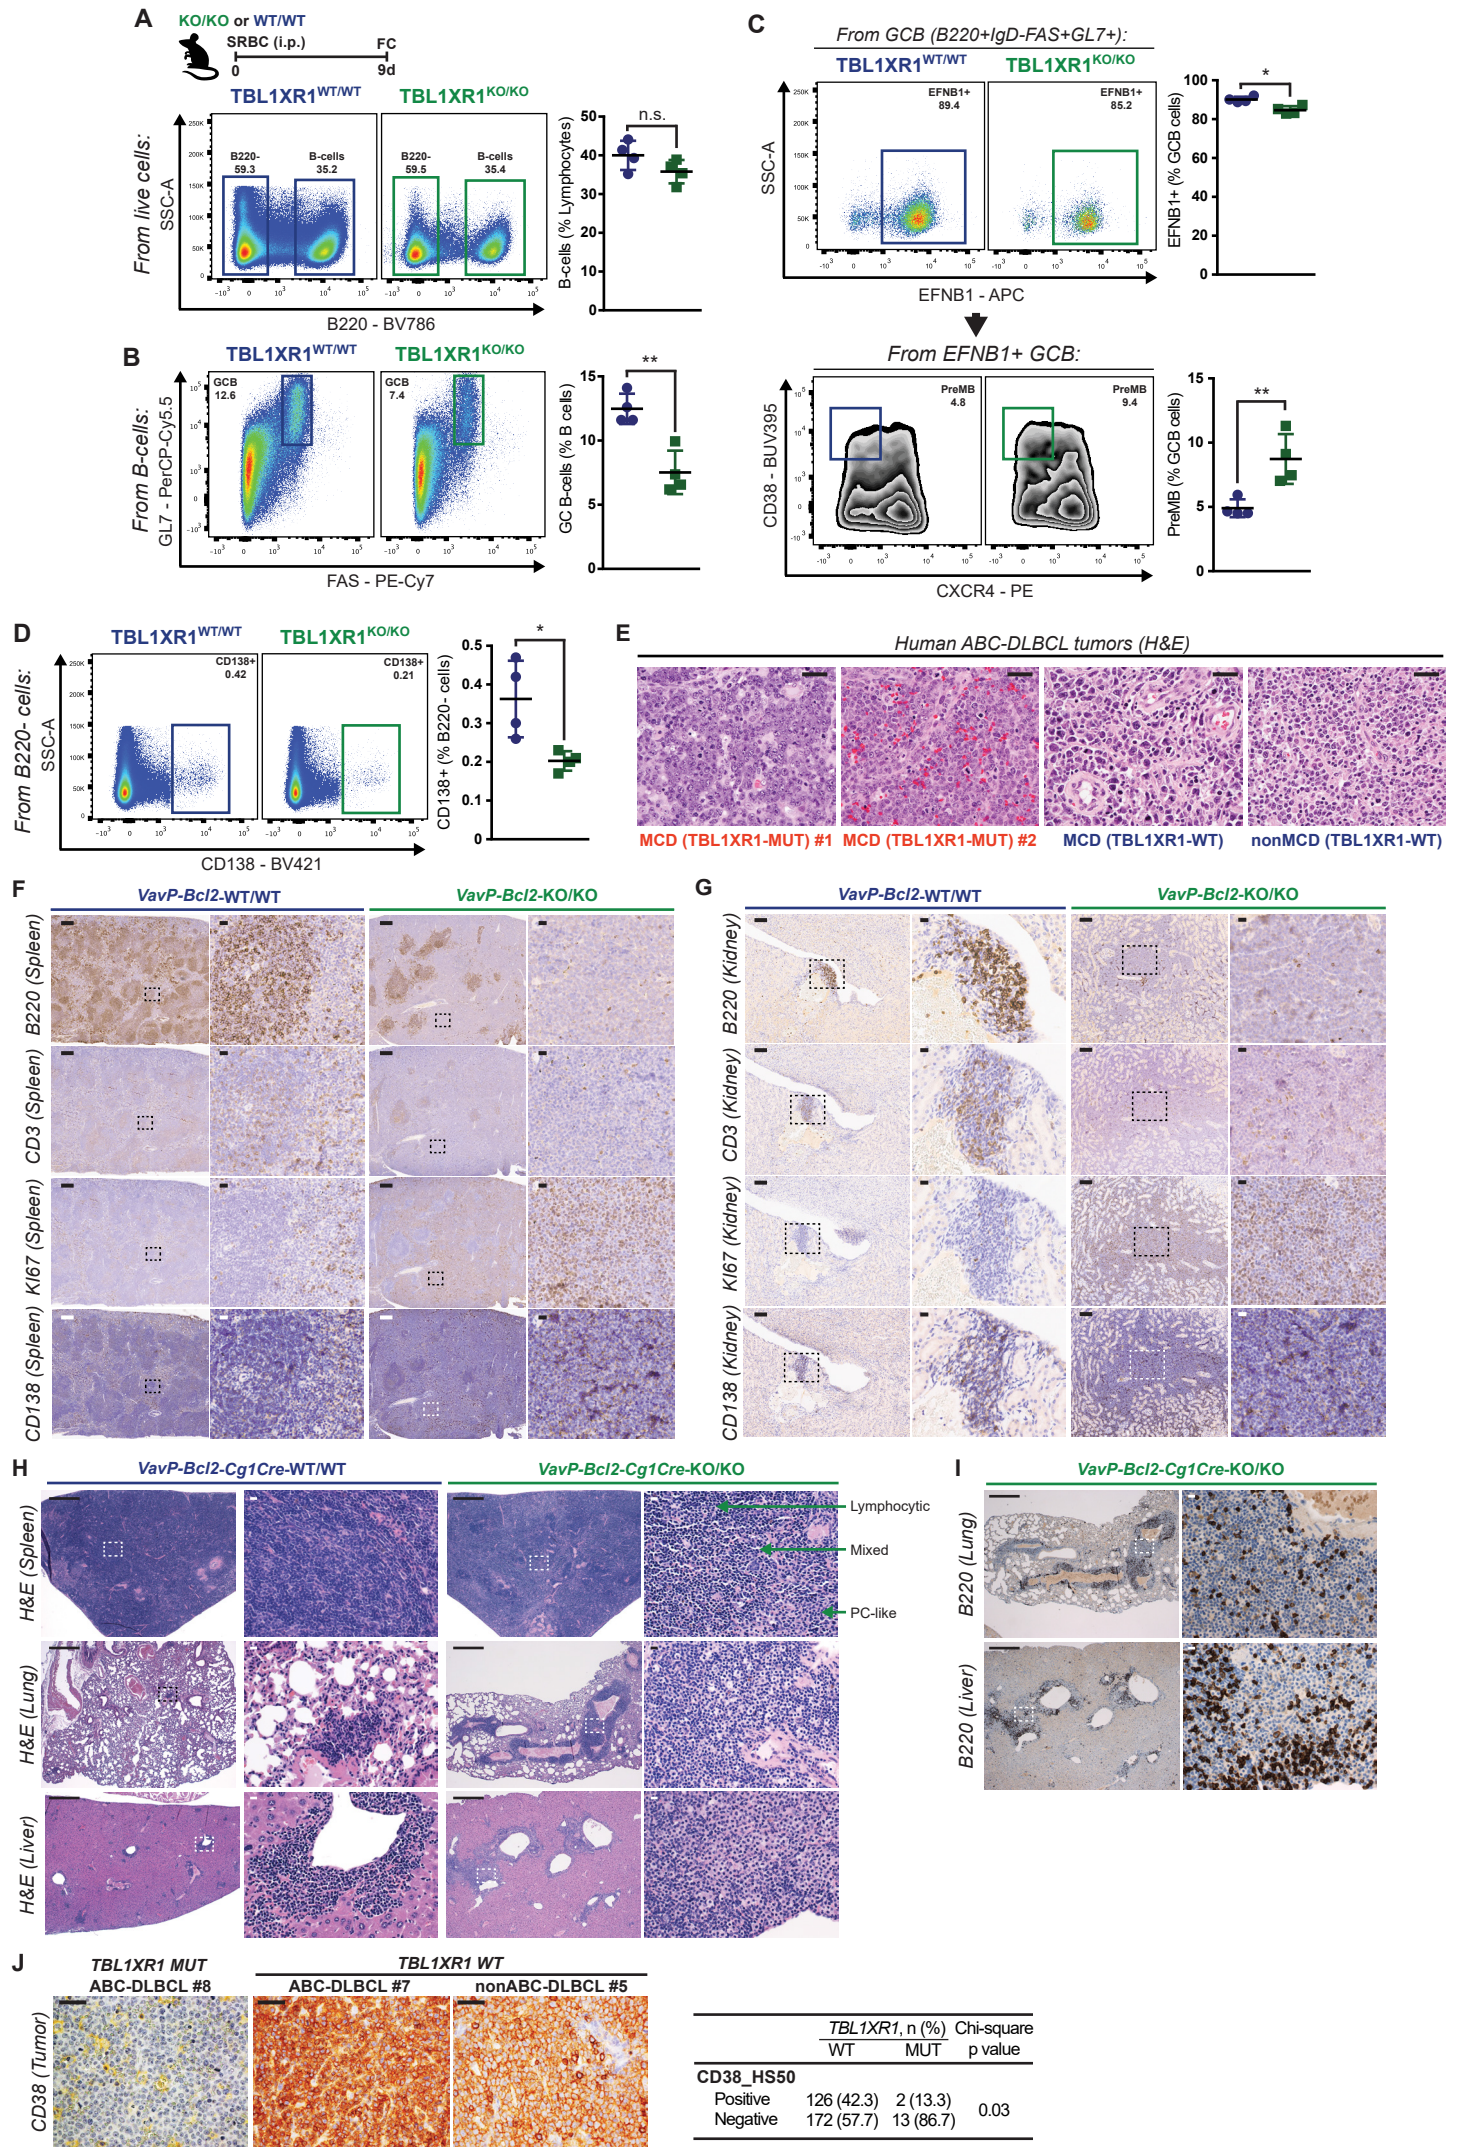

Supplement: NIHMS1599963-supplement-7.pdf [file NIHMS1599963-supplement-7.pdf]
